# Supplementary material
Source: publisher site journal article supplement (https://www.dovepress.com/article/288046)

**Supplementary material**

Figure S1: Crossing of social and material deprivation according to standard deviation


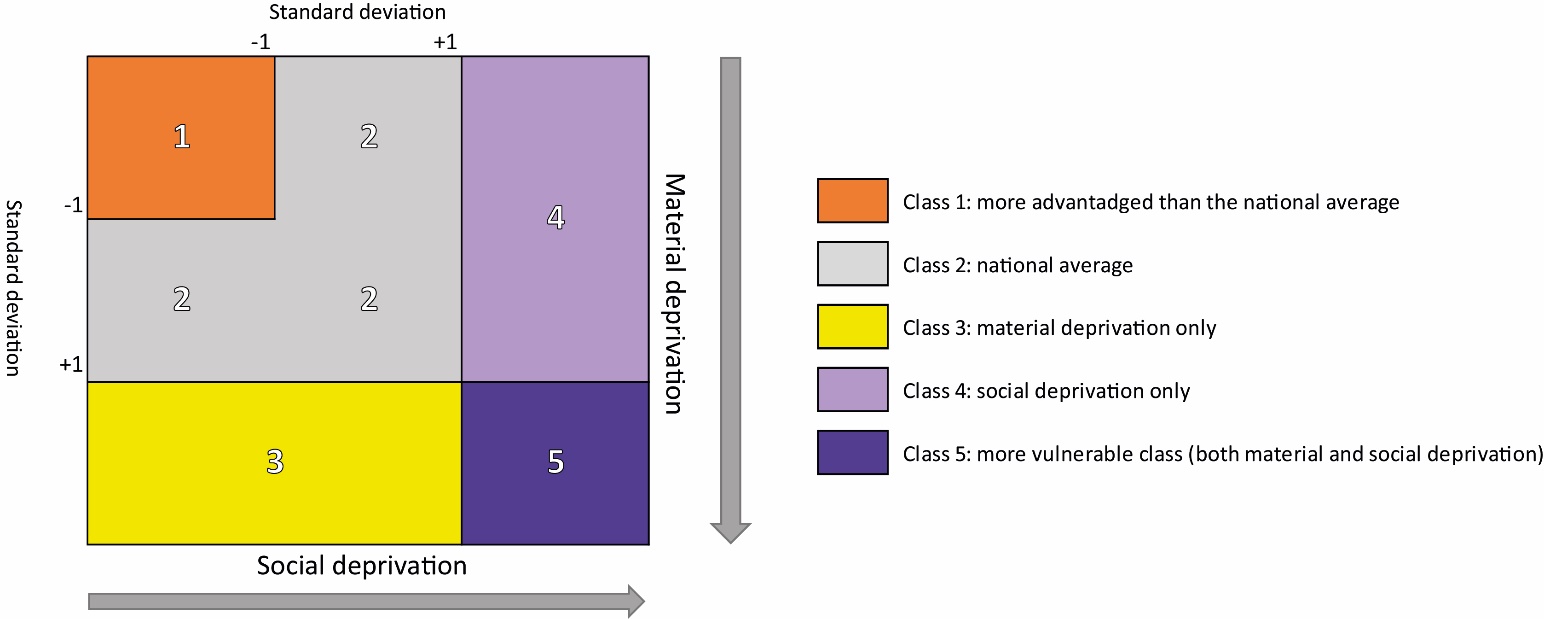

Supplement: Supplementary file 1 [file get_supplementary_file.php]
